# Supplementary figures and images for: Spatio-temporal optimization of groundwater monitoring networks using data-driven sparse sensing methods
Source: Copernicus journal article supplement (doi:10.5194/hess-2022-69), 2022-03-16

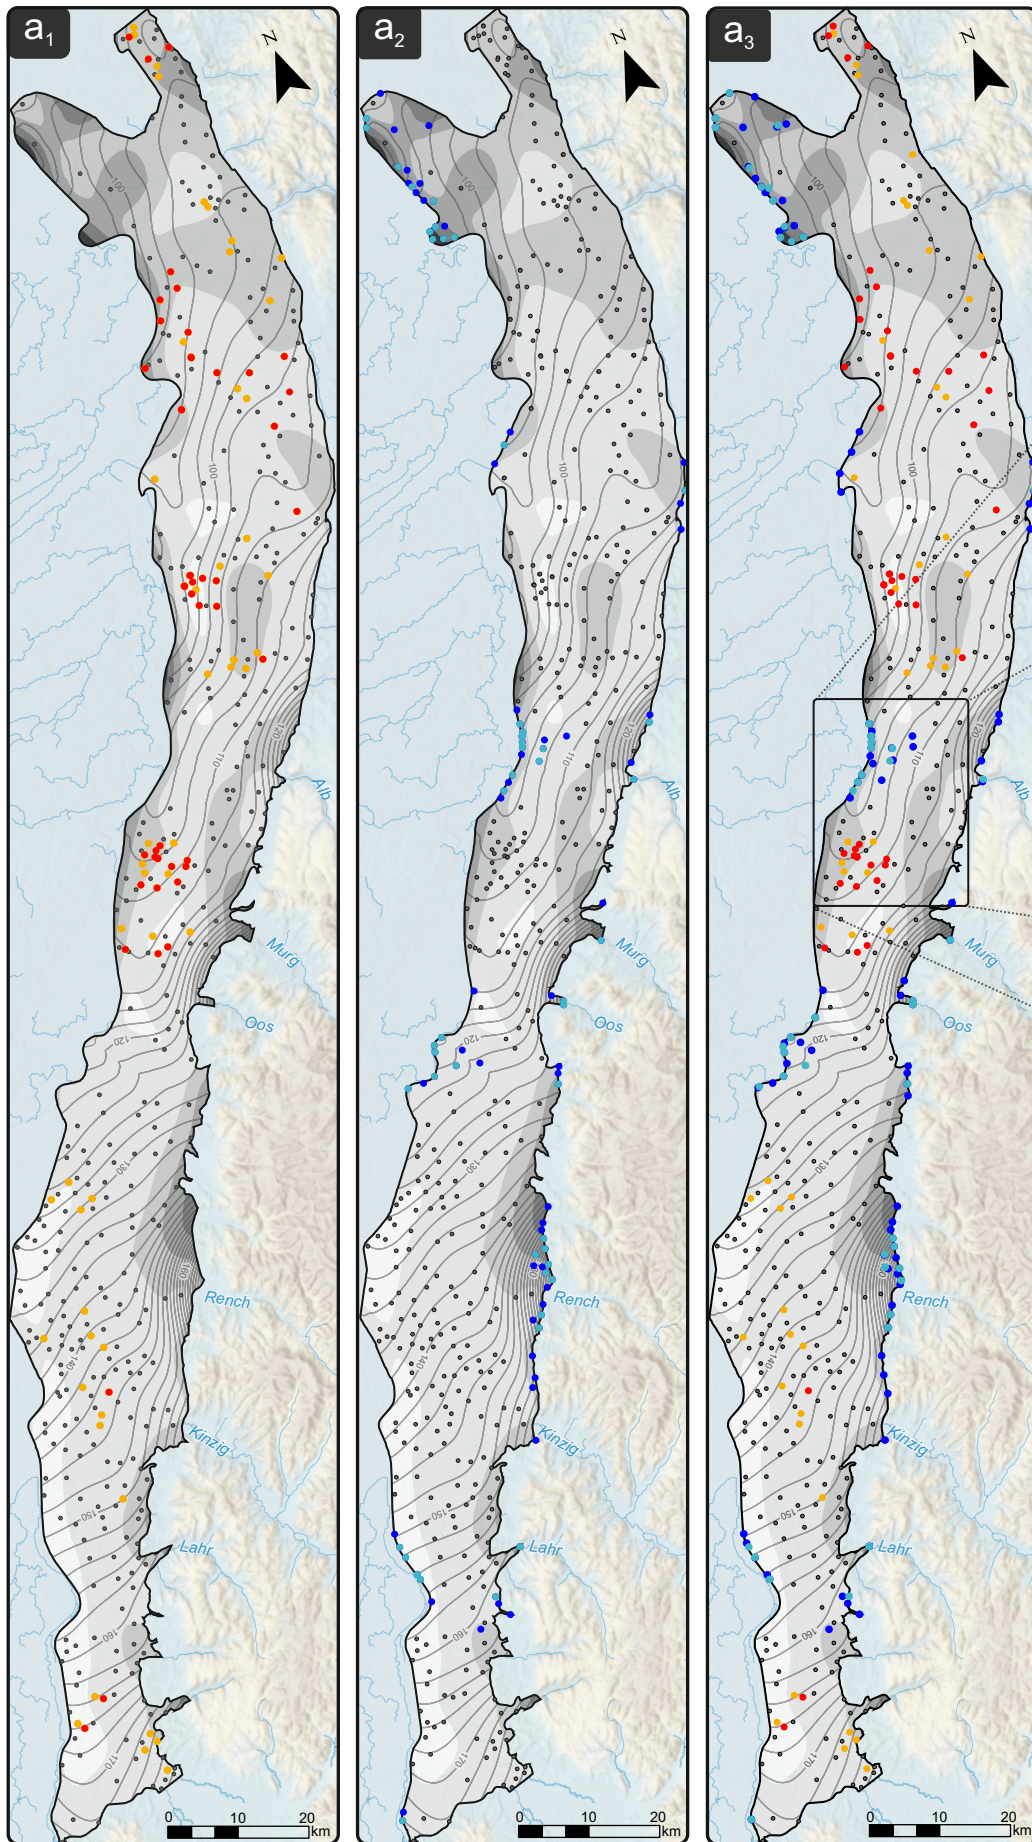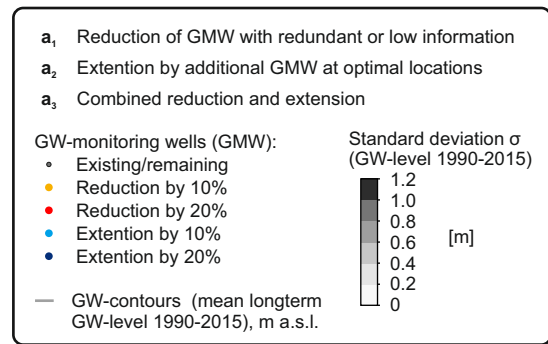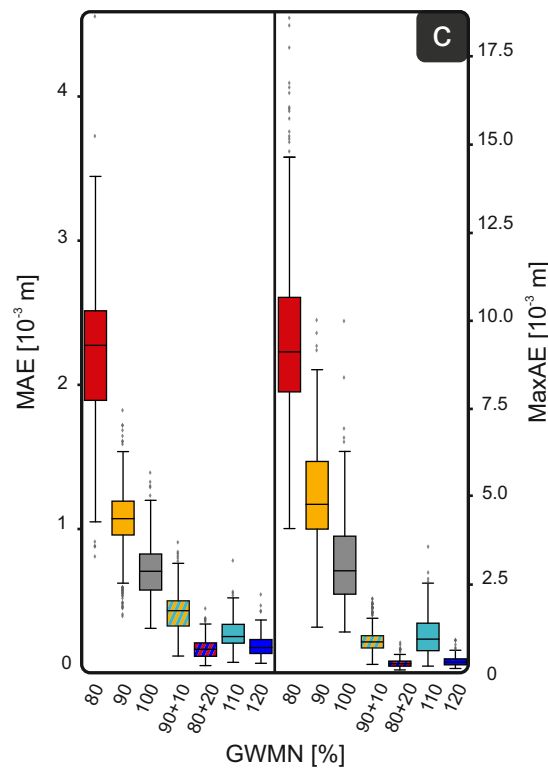

Supplement: Supplementary file 1 [file hess-2022-69-supplement.zip]

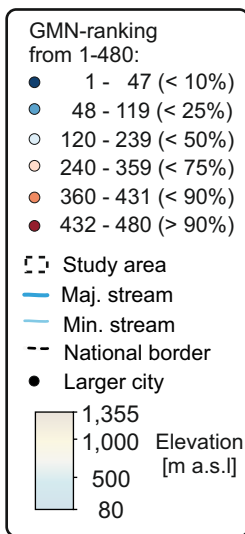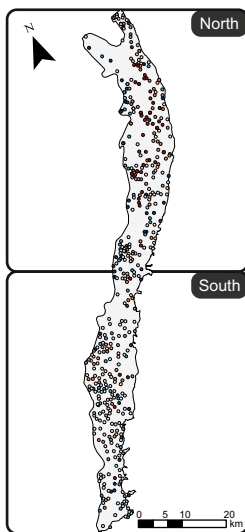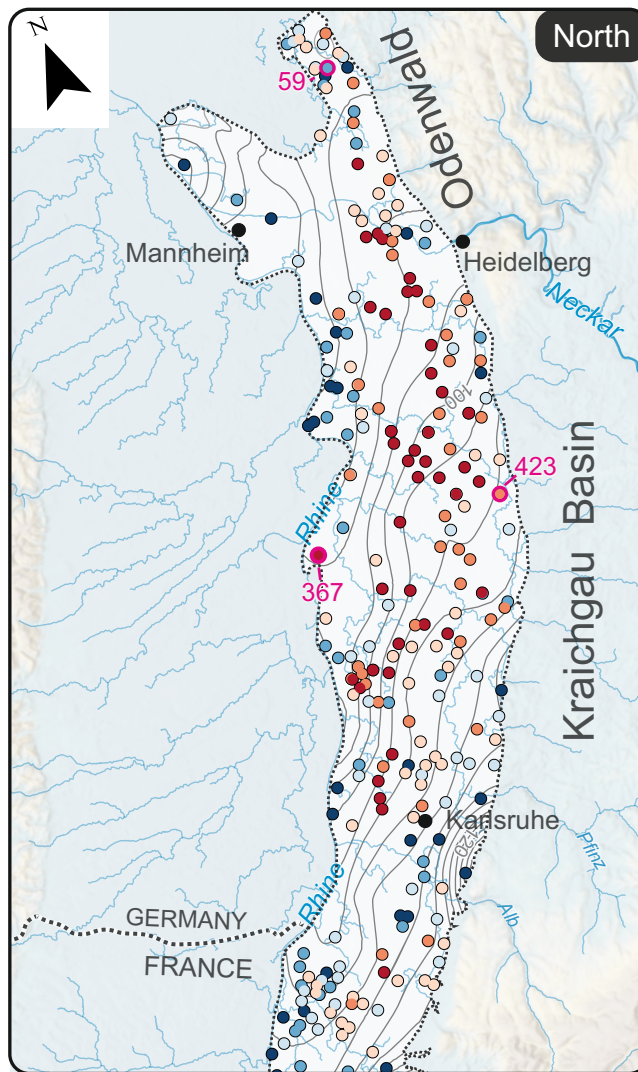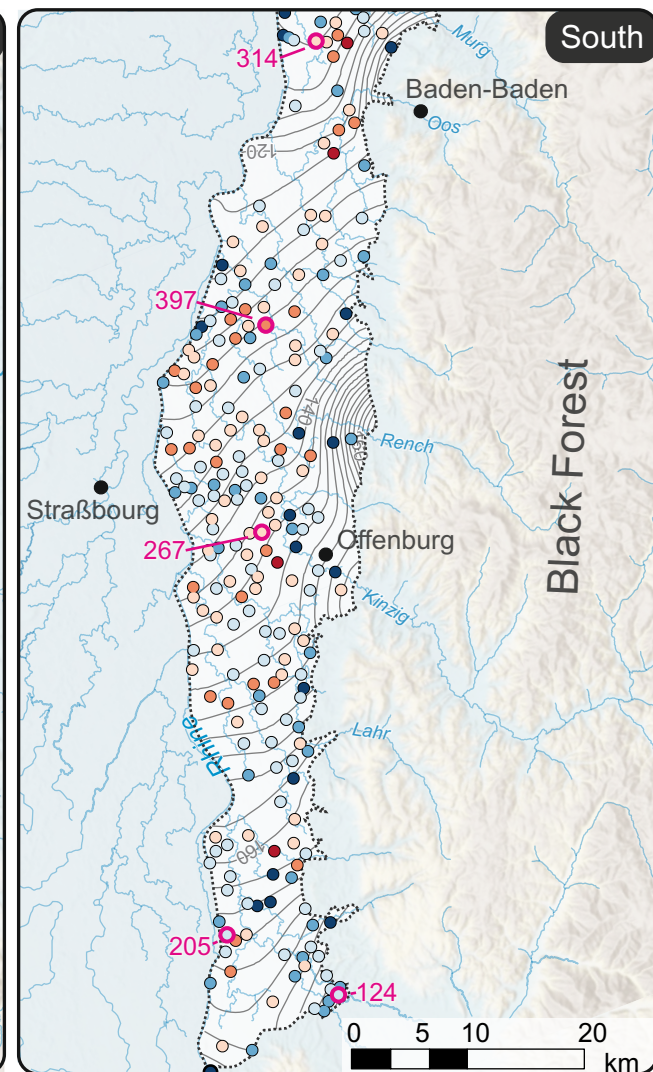

Supplement: Supplementary file 2 [file hess-2022-69-supplement.zip]

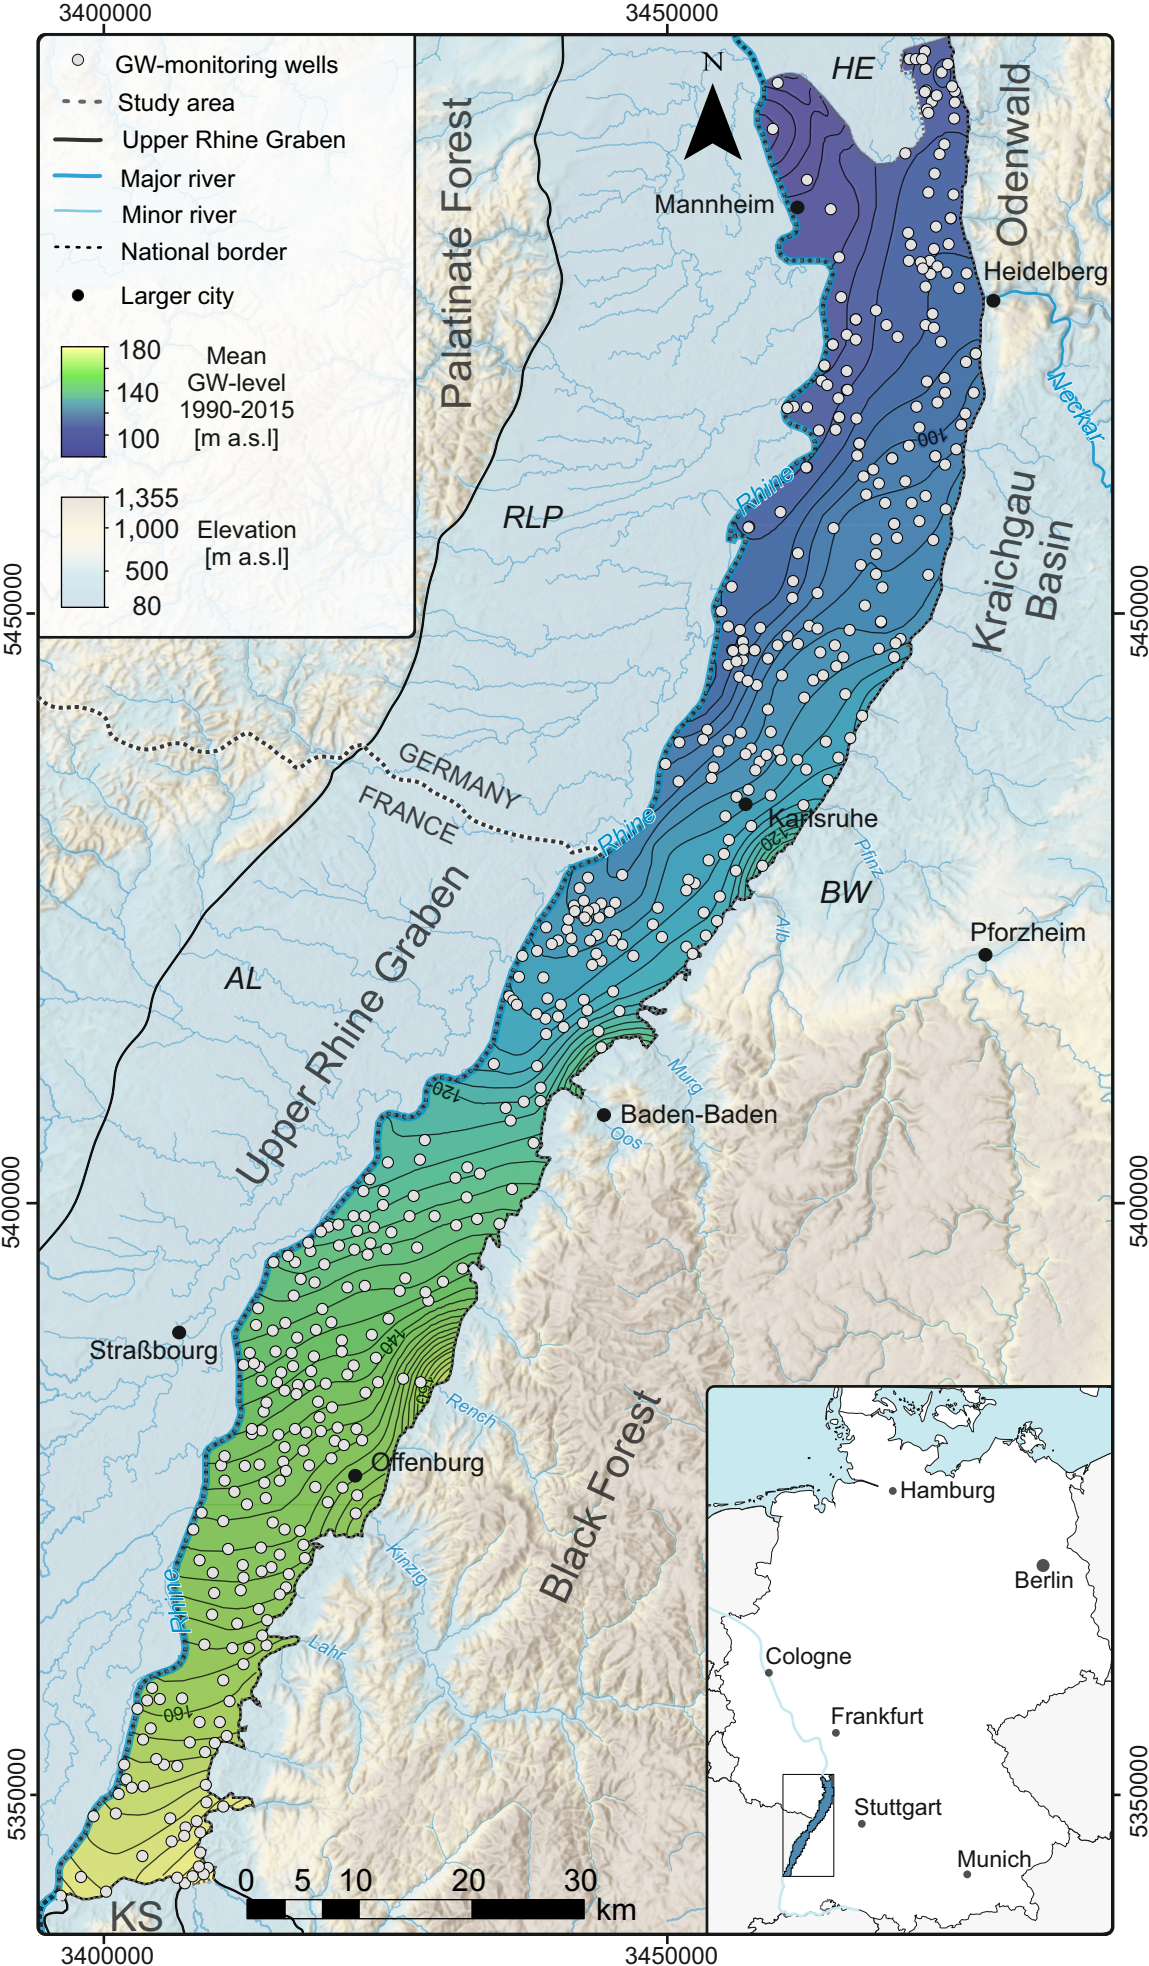

Supplement: Supplementary file 3 [file hess-2022-69-supplement.zip]

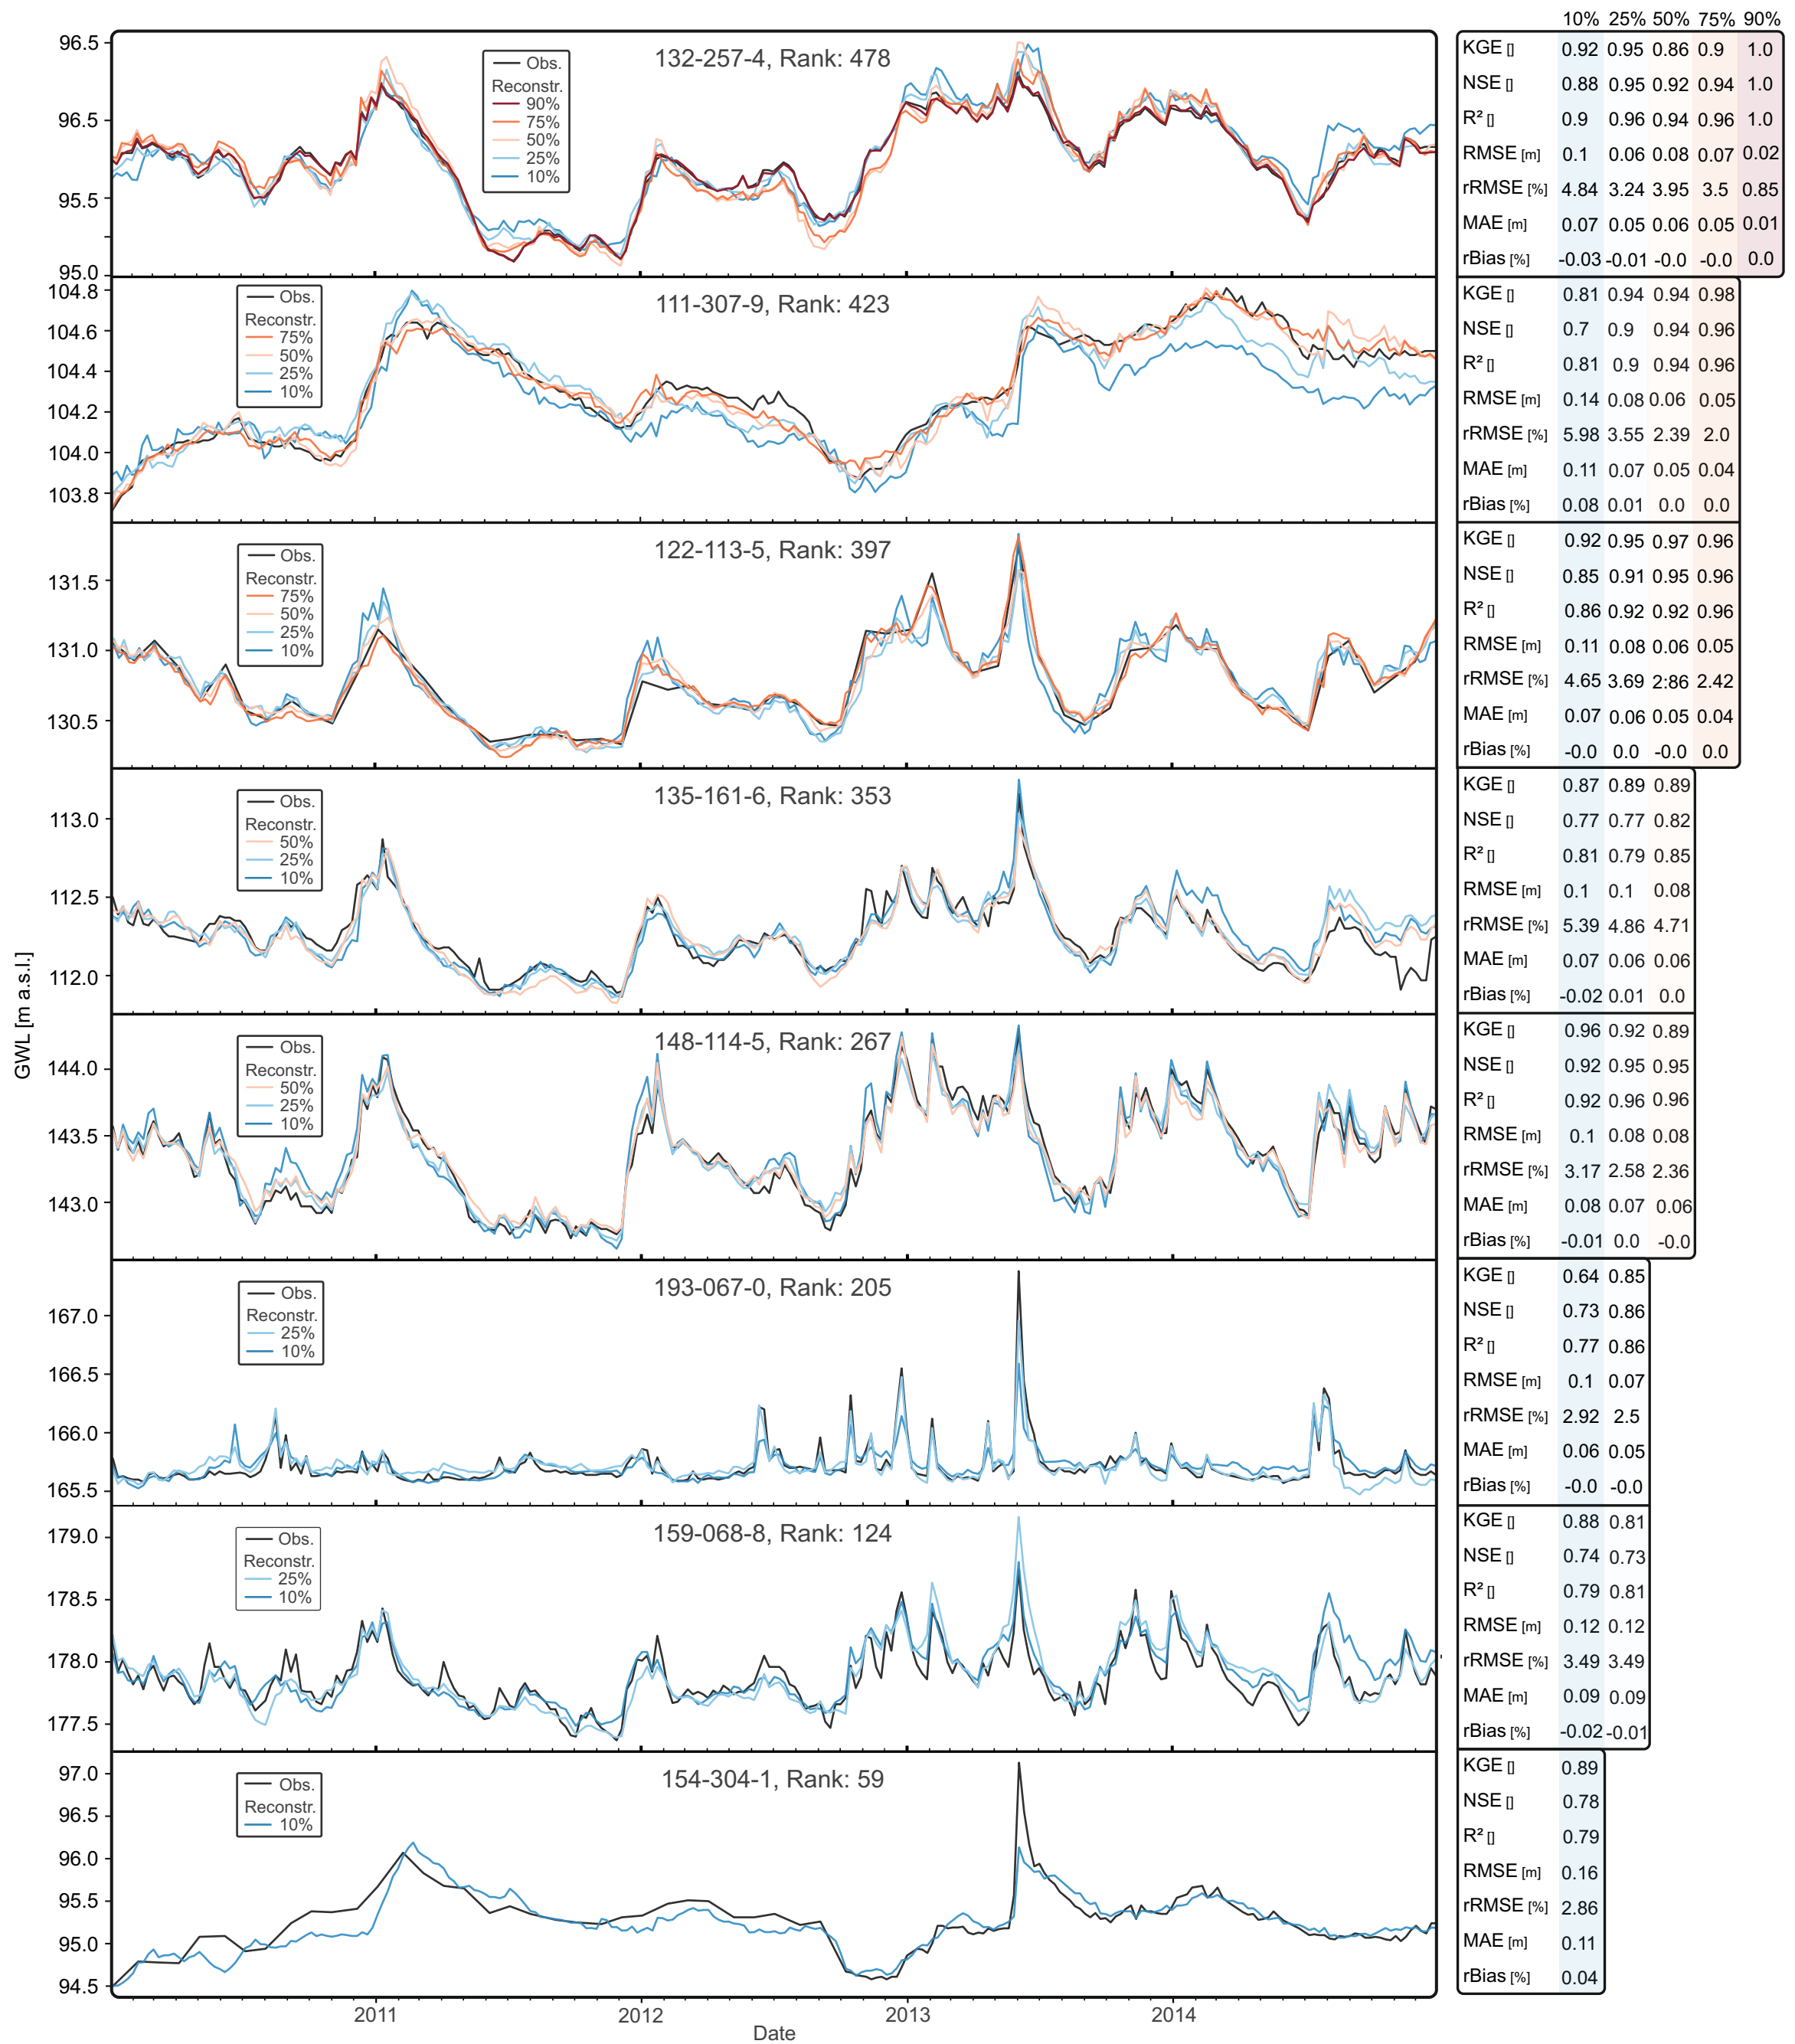

Supplement: Supplementary file 4 [file hess-2022-69-supplement.zip]

# Ranking:

- 1 - 47 (< 10%)
- 48 - 119 (10% - 24%)
- 120 - 239 (25% - 49%)
- 240 - 359 (50% - 74%)
- 360 - 431 (75% - 89%)
- 432 - 480 (> 90%)

# Different Ranking 1D vs. 2D:

- 0 - 50
- 51 - 100
- 101 - 150
- 151 - 200
- 201 - 250
- 251 - 300
- 301 - 350
- 351 - 400
- 401 - 480

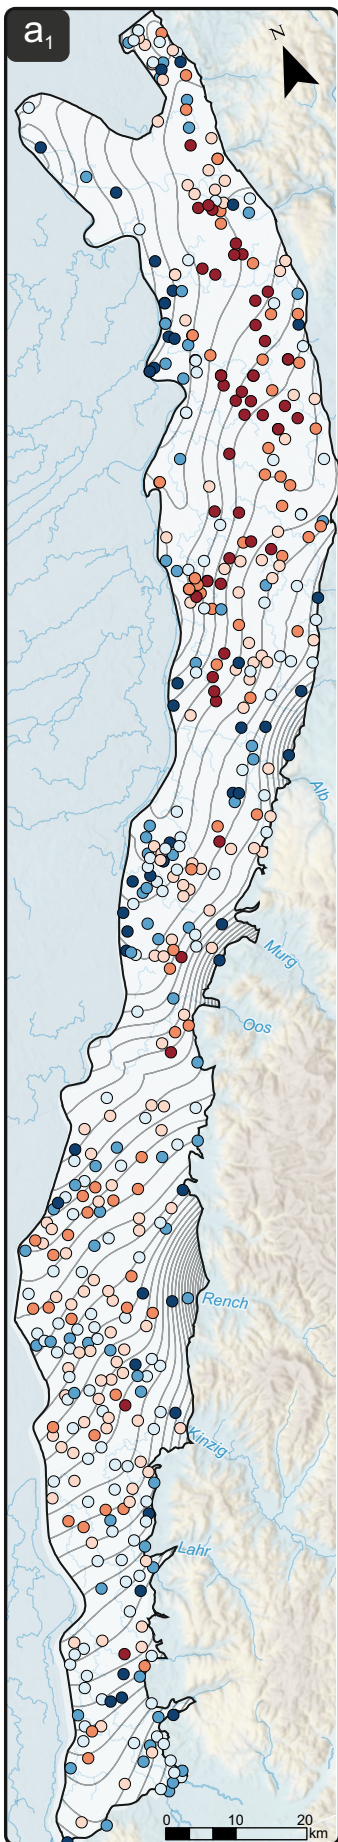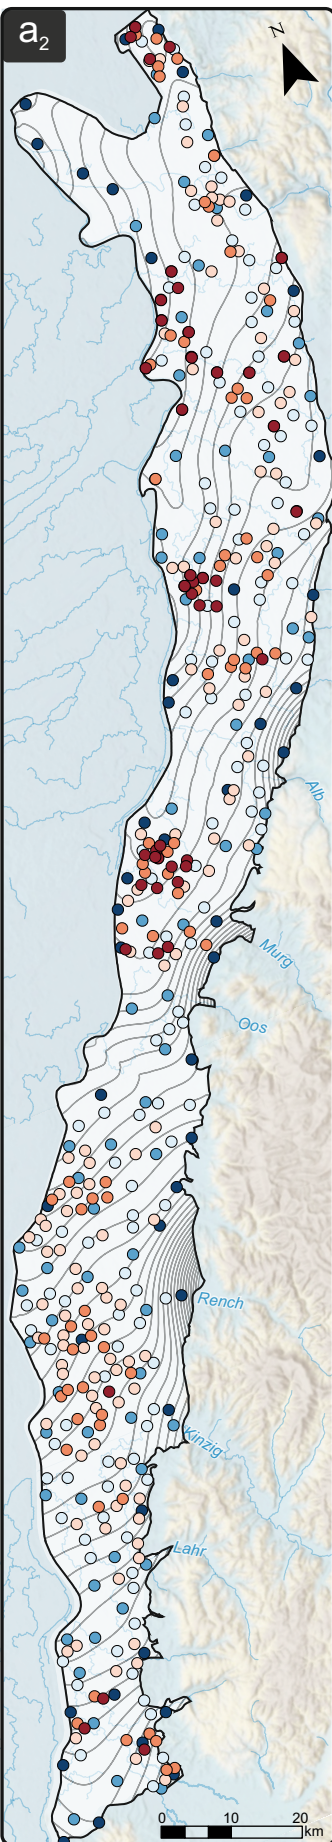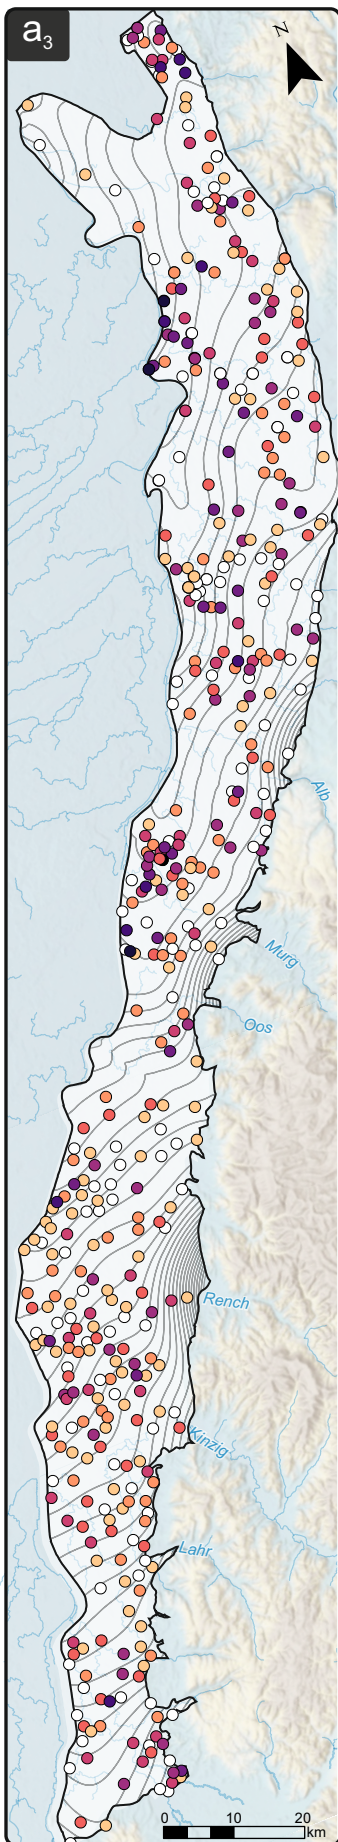

Supplement: Supplementary file 5 [file hess-2022-69-supplement.zip]

Rank 432-480 (> 90%)

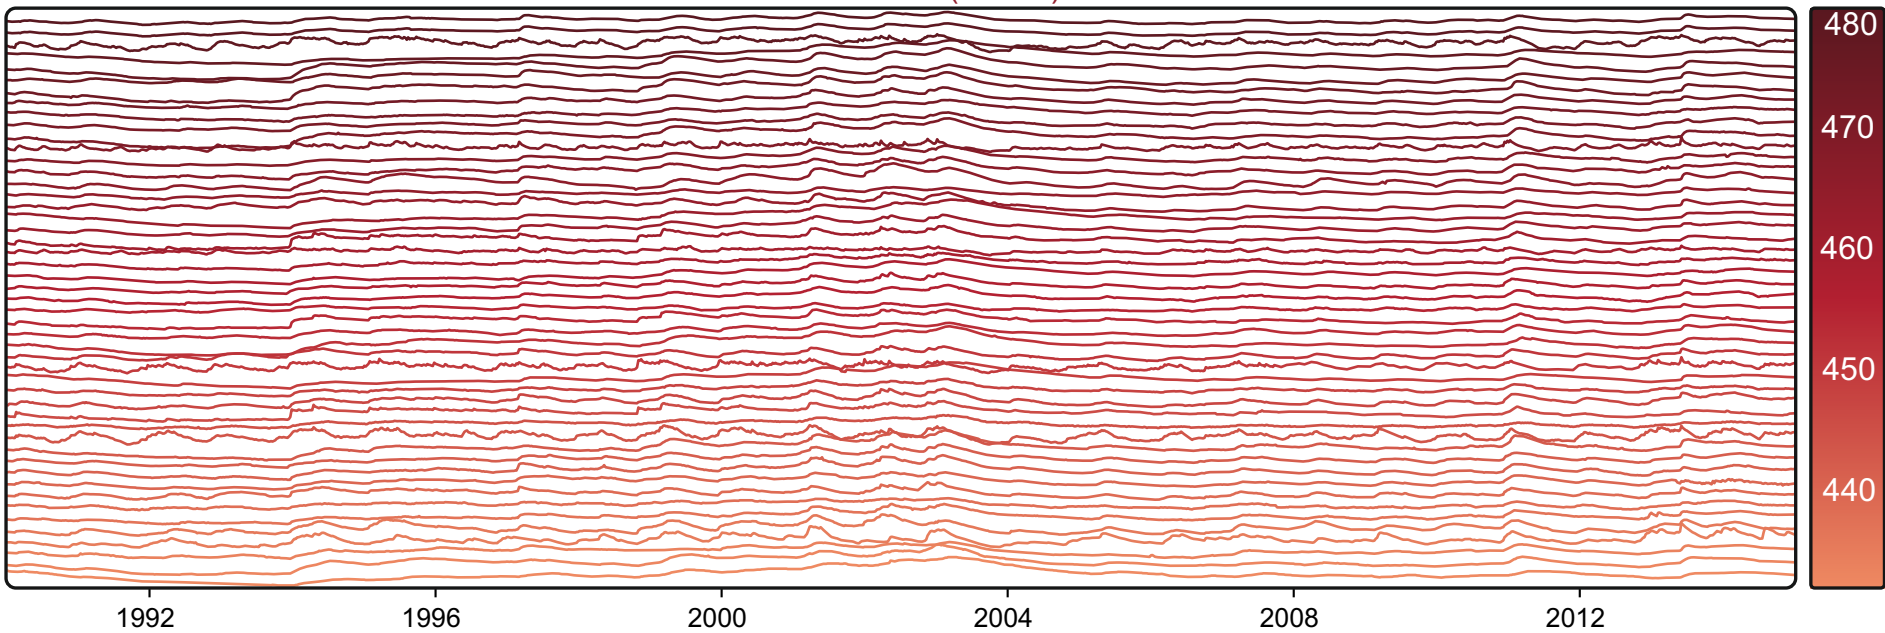

Rank 1-47 (< 10%)

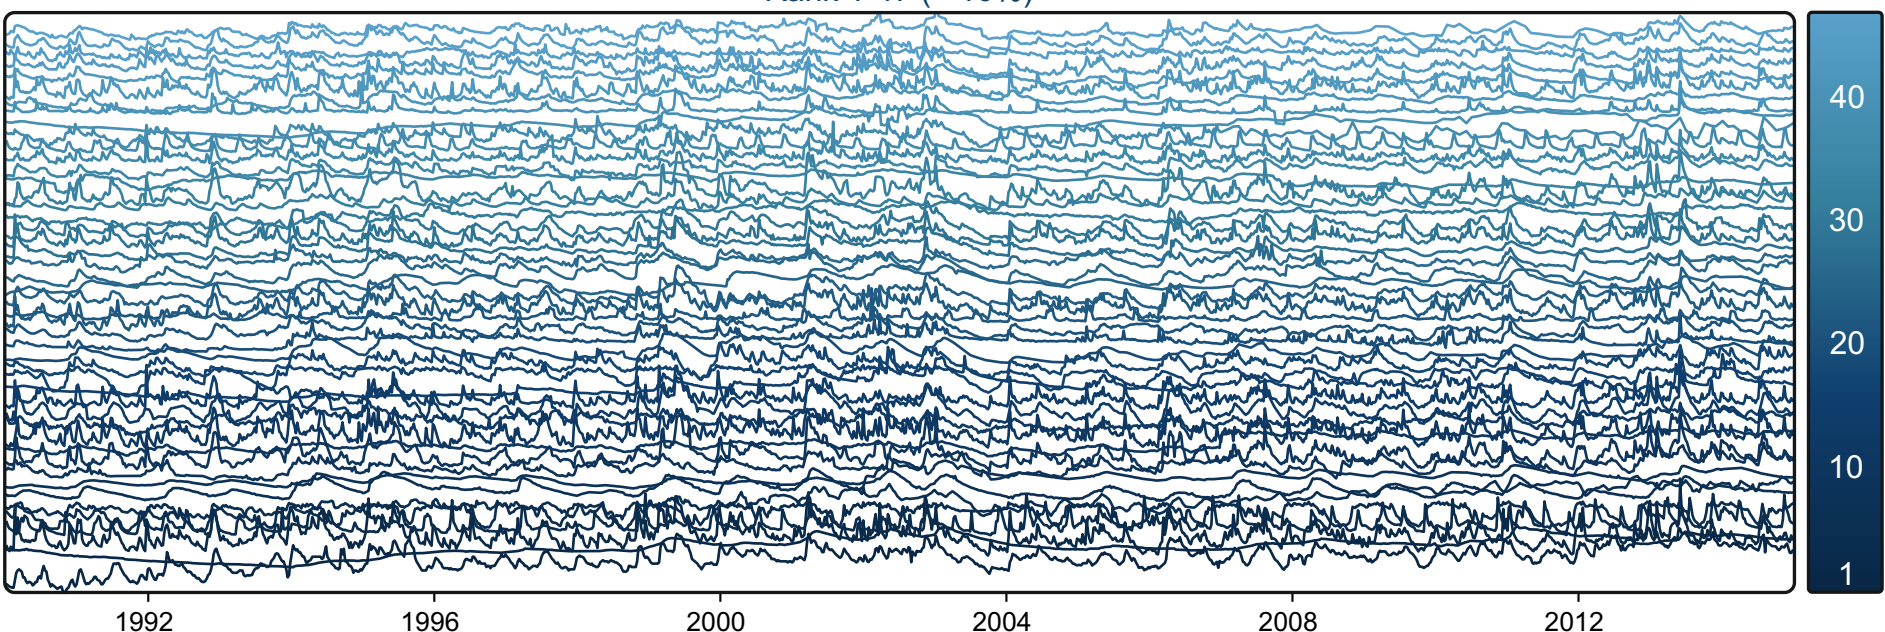

Supplement: Supplementary file 6 [file hess-2022-69-supplement.zip]

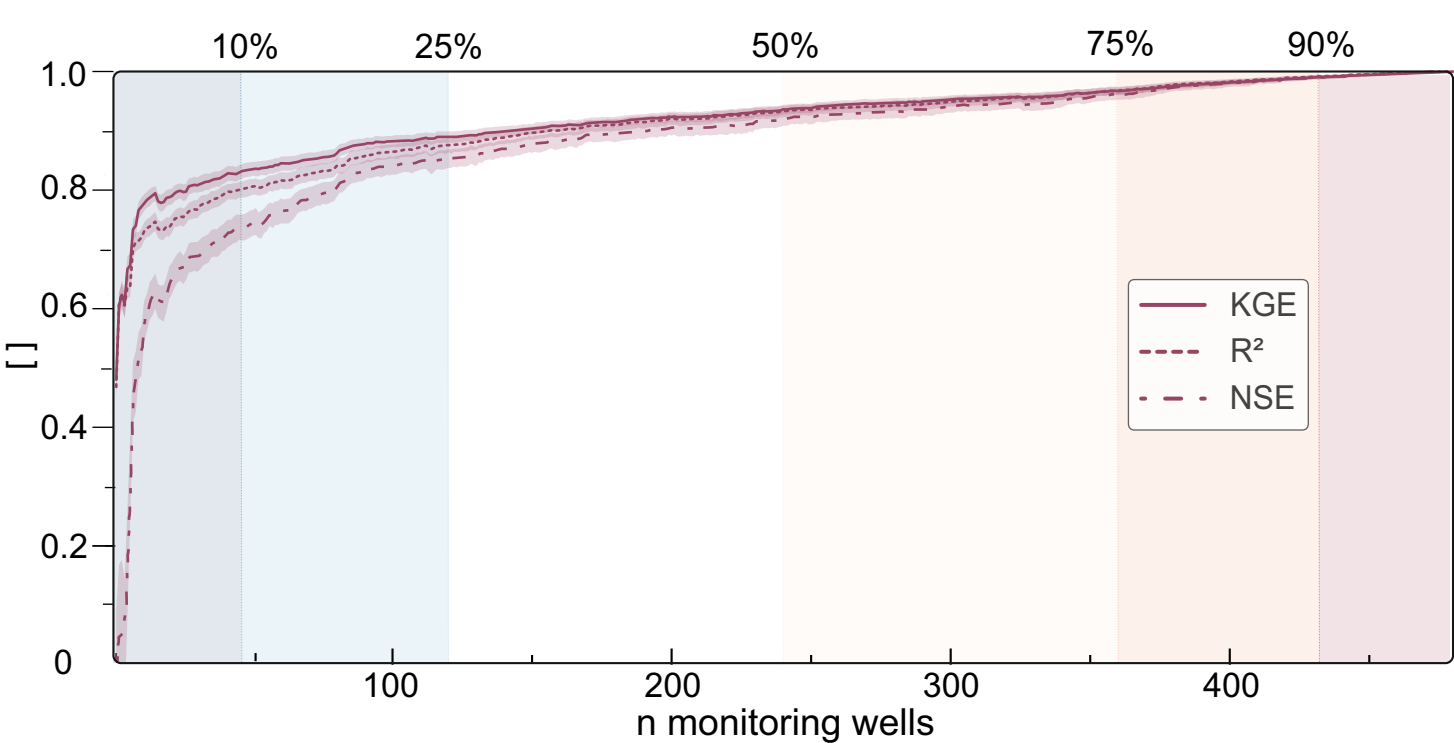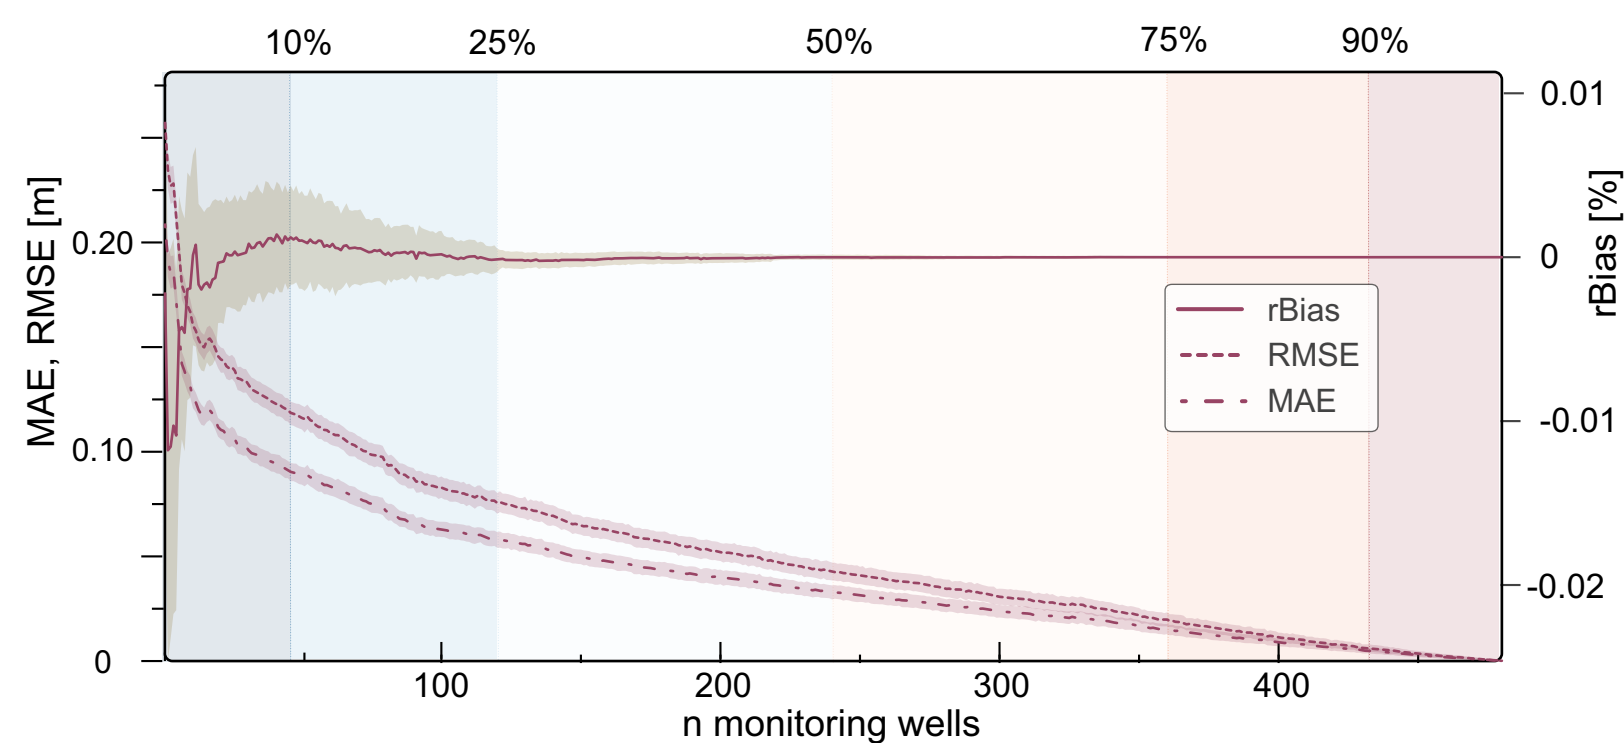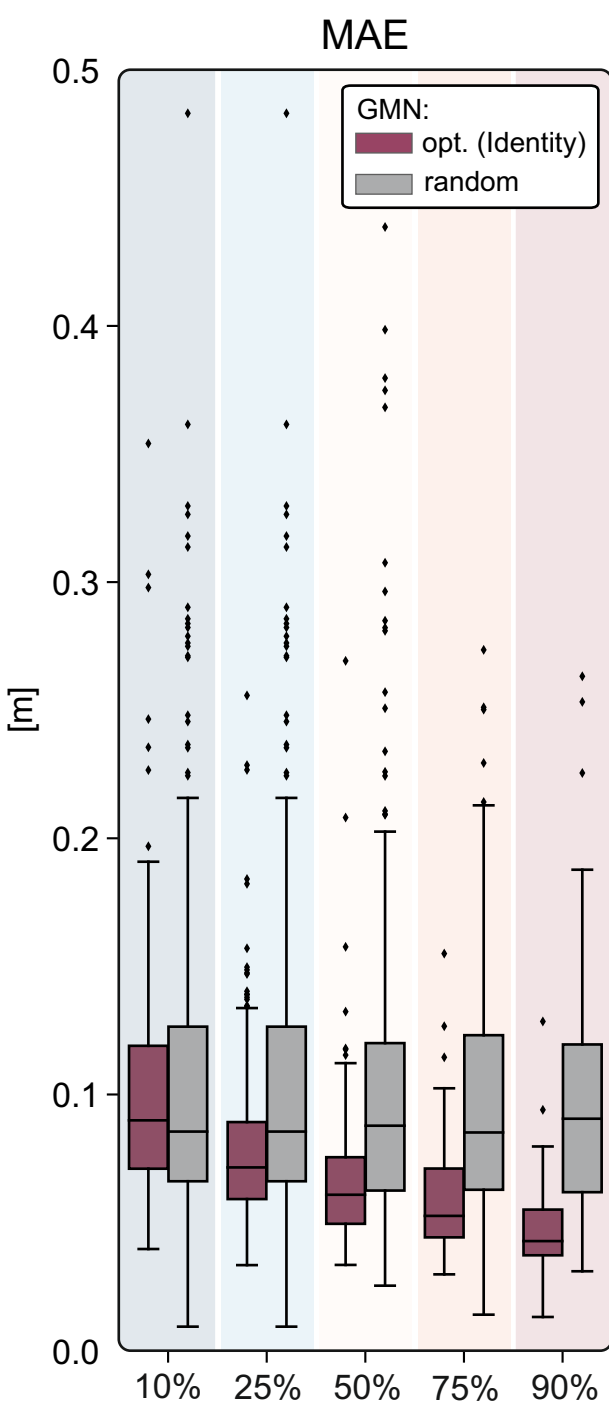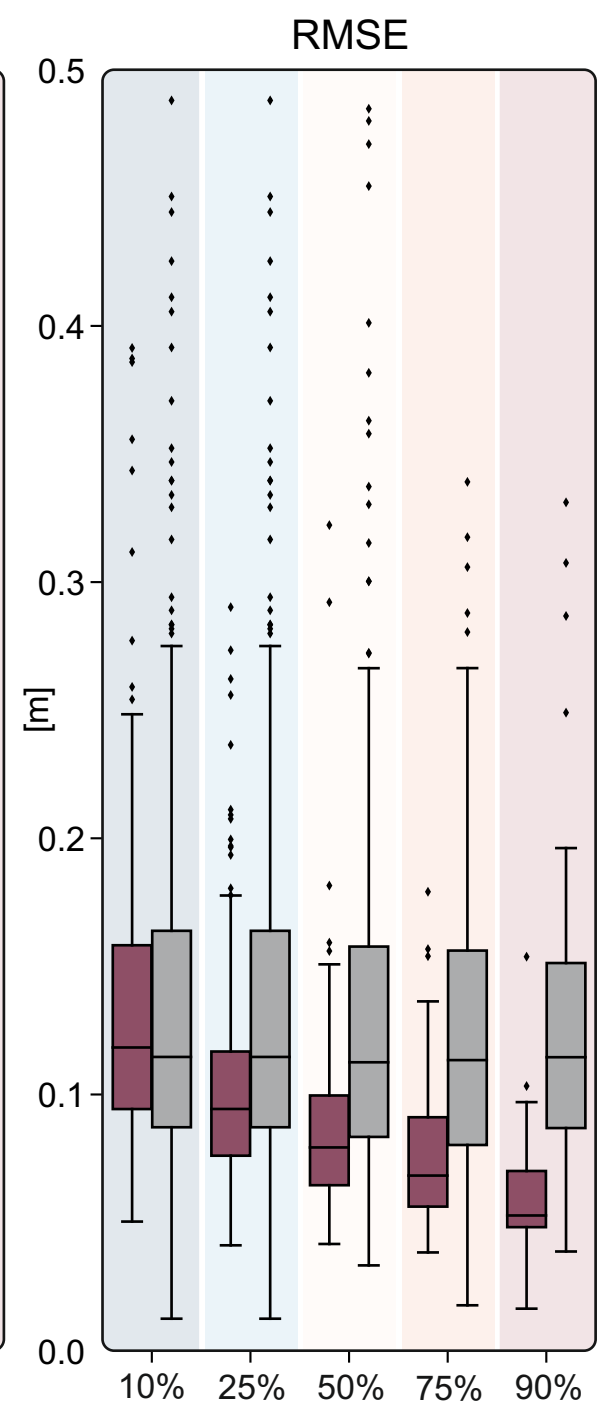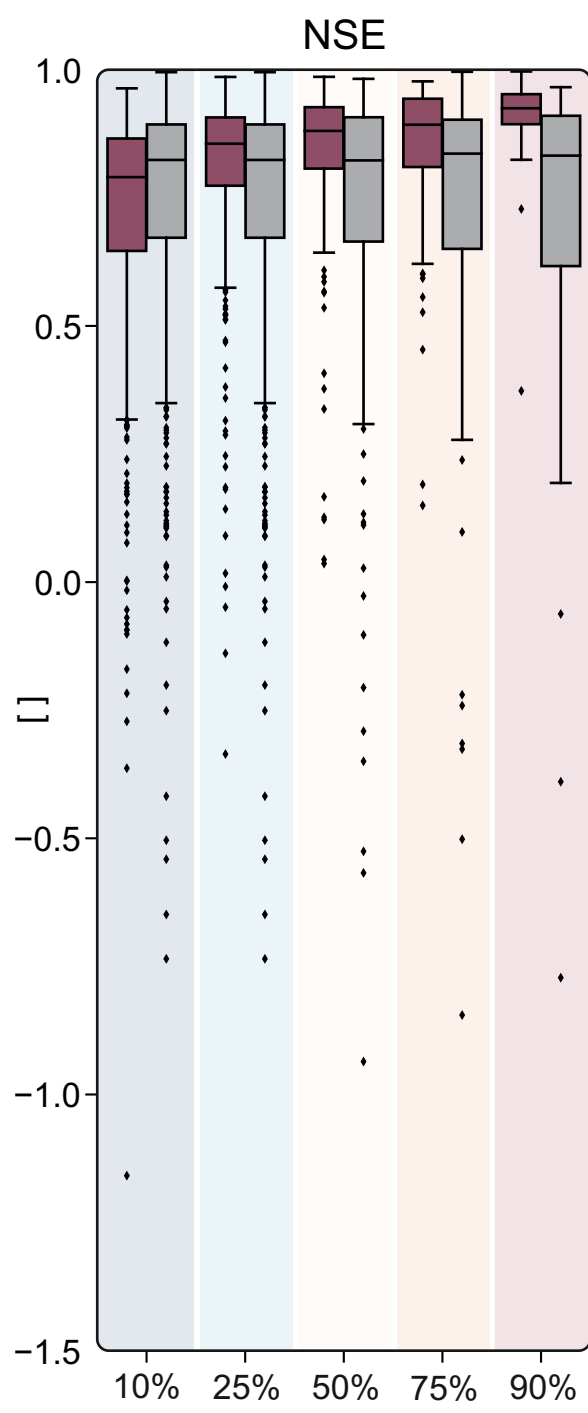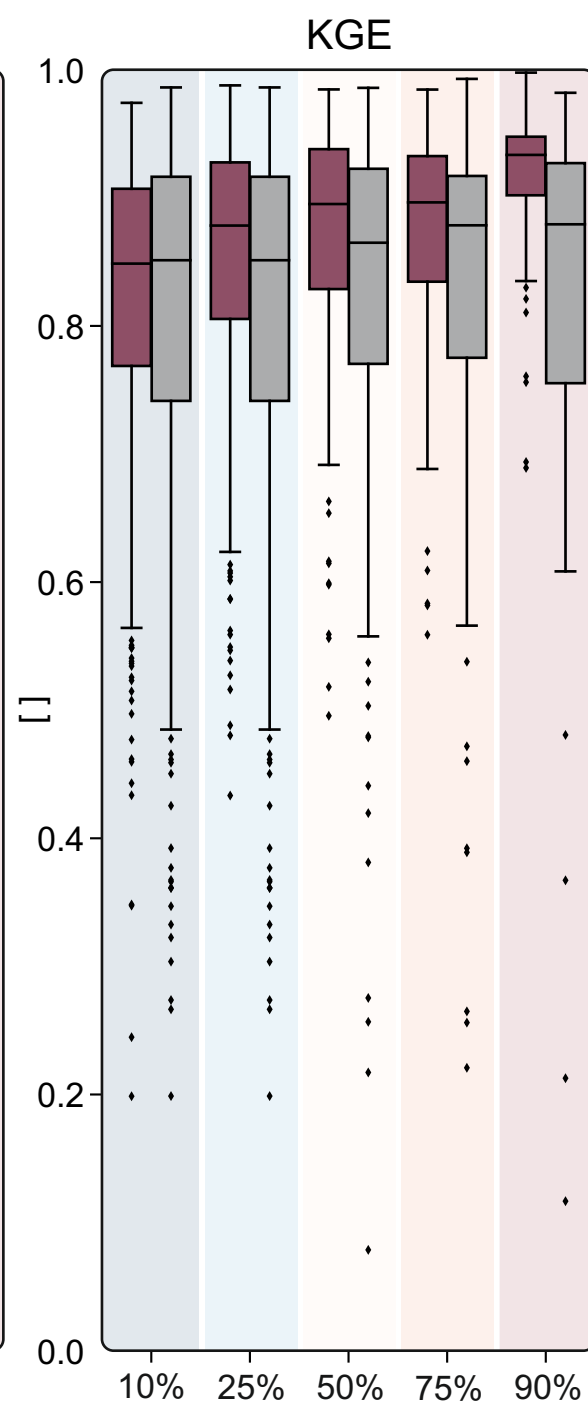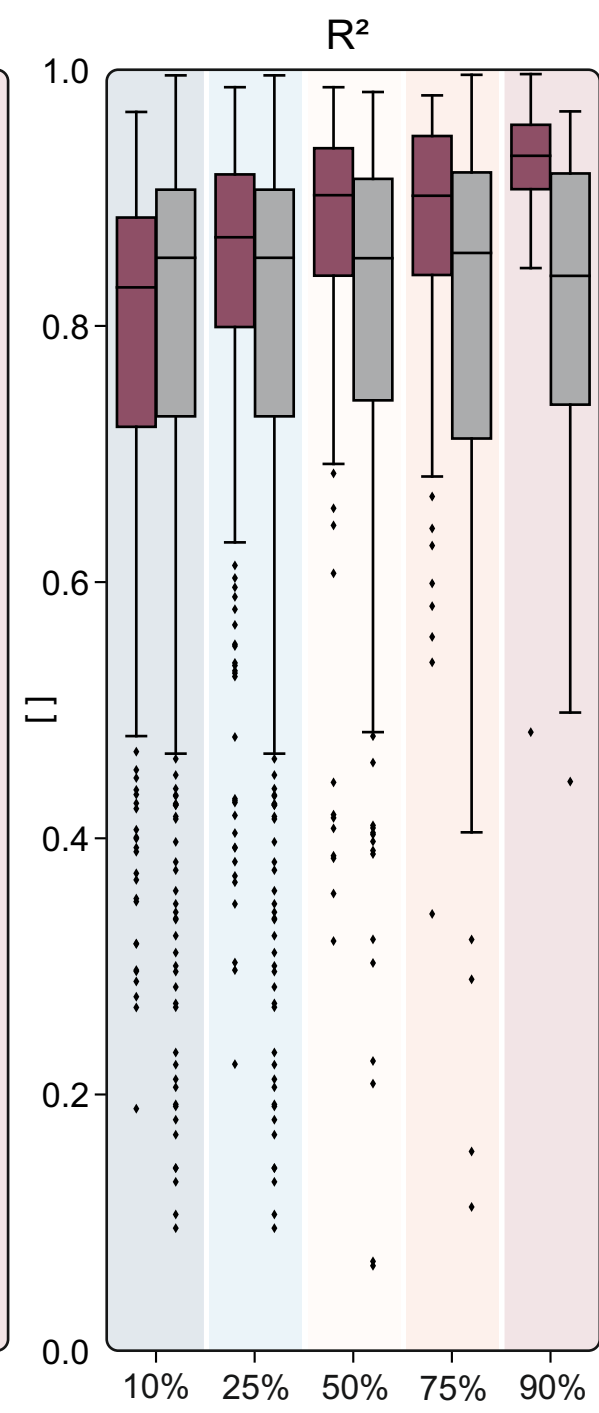

Supplement: Supplementary file 7 [file hess-2022-69-supplement.zip]

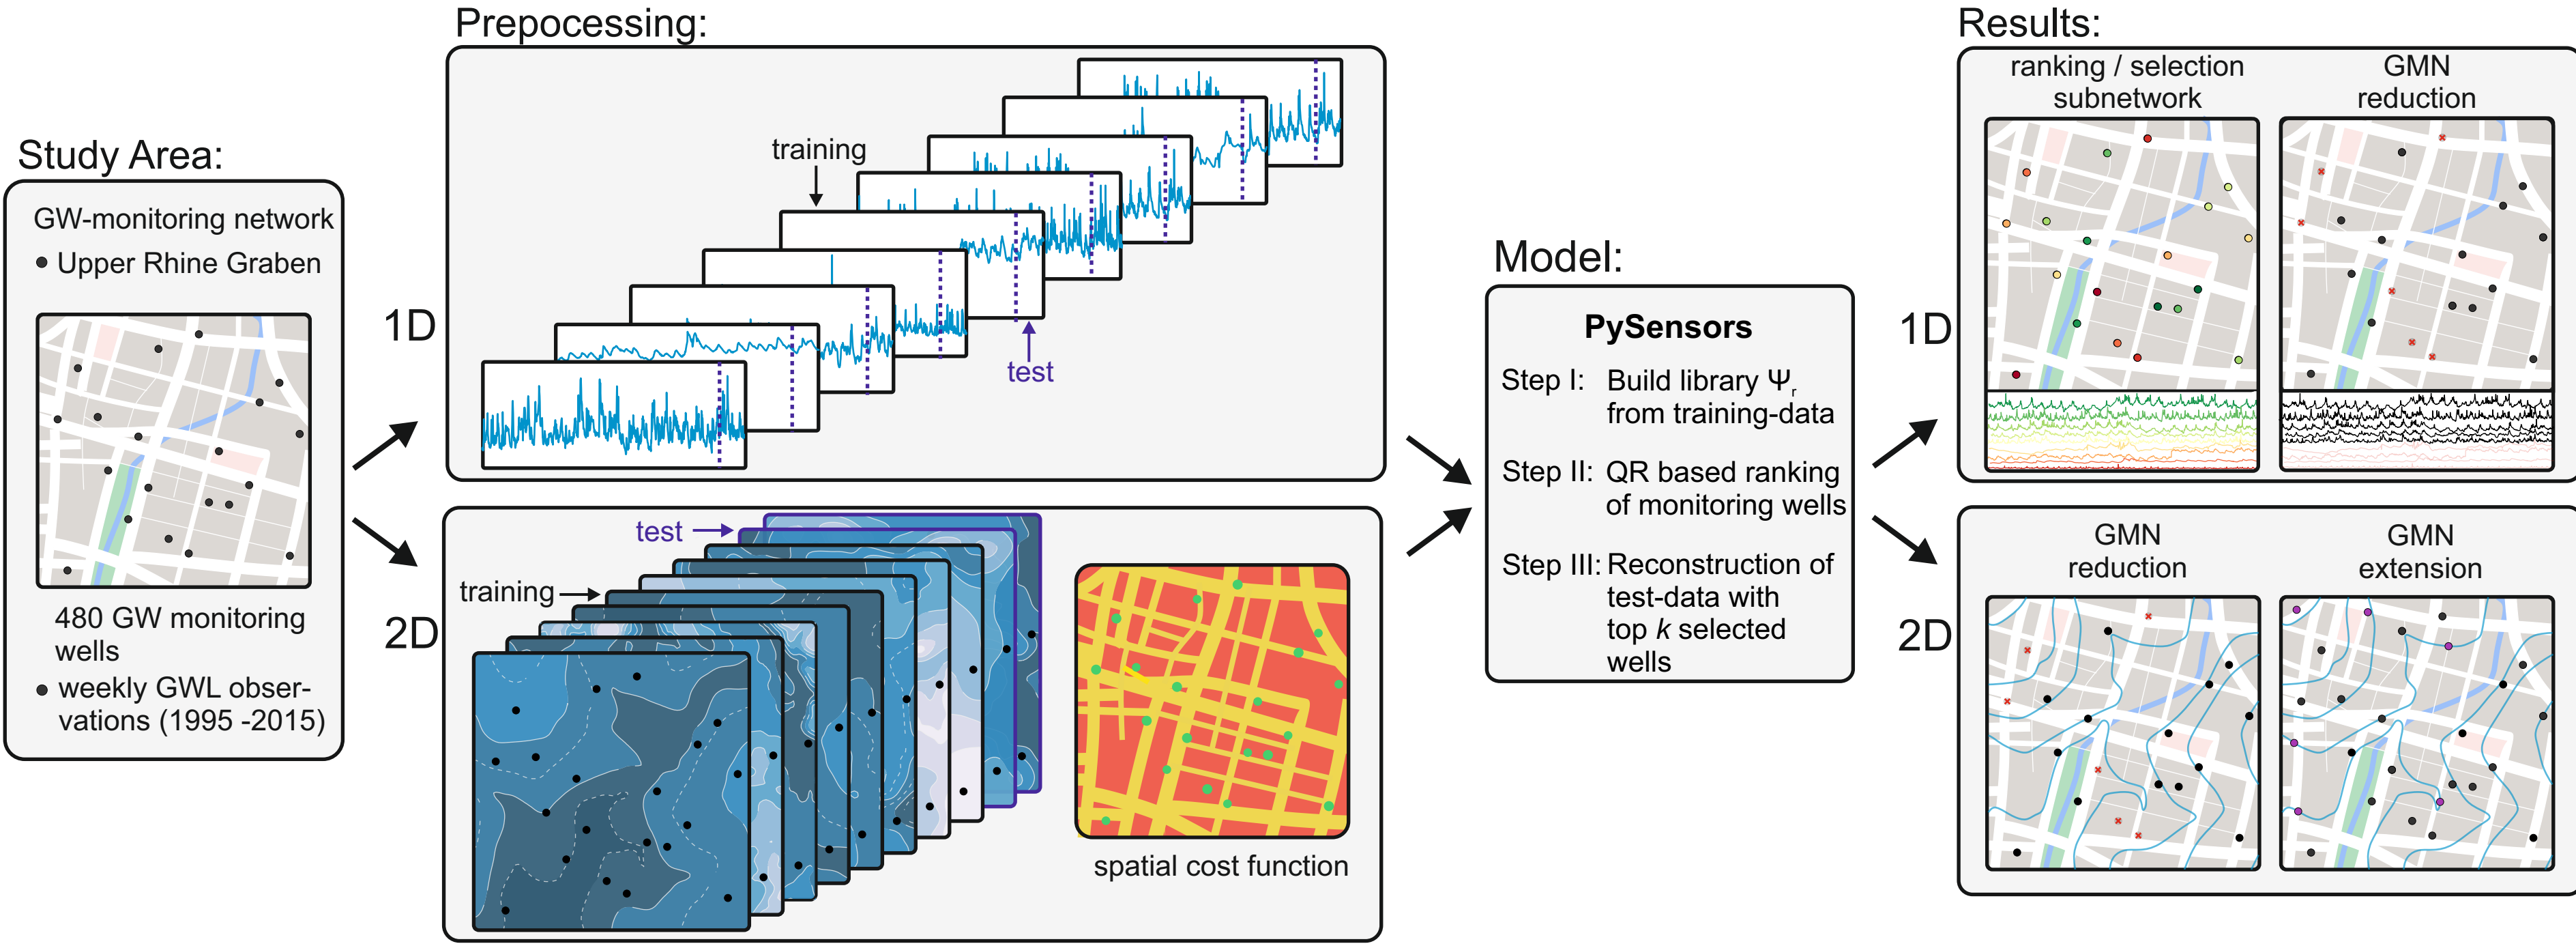

Supplement: Supplementary file 8 [file hess-2022-69-supplement.zip]

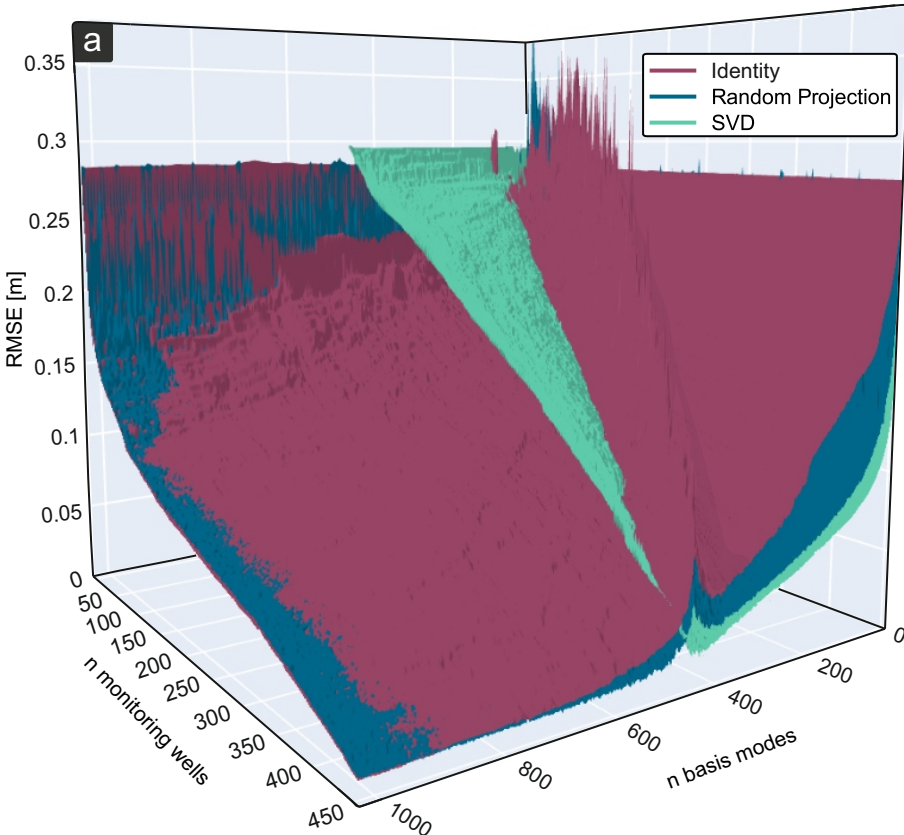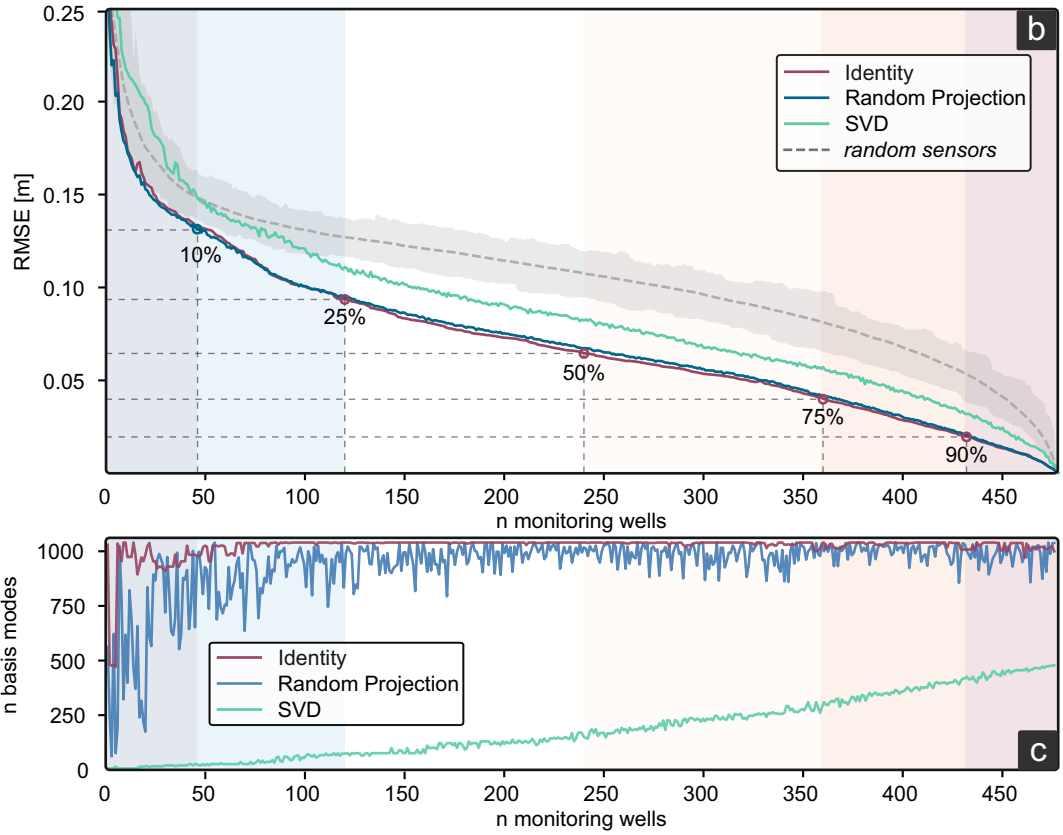

Supplement: Supplementary file 9 [file hess-2022-69-supplement.zip]
